# Supplementary material for: Statin Exposure Is Not Associated with Reduced Prevalence of Colorectal Neoplasia in Patients with Inflammatory Bowel Disease
Source: PubMed Central journal article supplement — Gut Liver. 2018 Dec 14;13(1):54–61. doi: 10.5009/gnl18178 (PMC6346999; doi:10.5009/gnl18178), 2018-12-14
Supplement: gnl-13-054_suppl.pdf [file gnl-13-054_suppl.pdf]

**Supplementary Table 1.** Propensity Score-Matched\* Cohort Characteristics

| Characteristics                                  | Statin exposed (n=57) | Statin non-exposed (n=114) | p-value |
|--------------------------------------------------|-----------------------|----------------------------|---------|
| Male sex                                         | 31 (54.4)             | 60 (52.6)                  | 0.83    |
| Age at study inclusion, yr                       | 61±12                 | 58±12                      | 0.18    |
| IBD diagnosis                                    |                       |                            | 0.07    |
| Ulcerative colitis                               | 43 (75.4)             | 78 (68.4)                  |         |
| Crohn's colitis                                  | 11 (19.3)             | 35 (30.7)                  |         |
| Indeterminate colitis                            | 3 (5.3)               | 1 (0.9)                    |         |
| IBD duration, yr                                 | 19 (18)               | 20 (18)                    | 0.69    |
| Extensive disease/pancolitis                     | 27 (47.4)             | 55 (48.2)                  | 0.91    |
| PSC                                              | 4 (7.0)               | 19 (16.7)                  | 0.08    |
| No. of surveillance colonoscopies                | 4.1±2.4               | 4.2±3.1                    | 0.88    |
| Inflammation score during follow-up <sup>†</sup> | 0.57                  | 0.66                       | 0.37    |
| Follow-up duration, yr                           | 4.9±4.4               | 4.8±4.0                    | 0.82    |
| Biologics exposure                               | 10 (18)               | 43 (41)                    | 0.002   |
| Thiopurine exposure                              | 19 (33.3)             | 43 (37.7)                  | 0.57    |
| 5-ASA exposure                                   | 49 (86.0)             | 90 (78.9)                  | 0.27    |
| NSAID exposure                                   | 5 (8.8)               | 5 (4.4)                    | 0.25    |

Data are presented as number (%) or mean±SD.

IBD, inflammatory bowel disease; PSC, primary sclerosing cholangitis; 5-ASA, 5-aminosalicylates; NSAID, nonsteroidal anti-inflammatory drug.

\*Propensity score analysis was performed with the following factors determined a priori: age (±10 years), sex, inflammation extent, mean inflammation score, IBD duration (±5 years), and number of colonoscopies; <sup>†</sup>Mean.

**Supplementary Table 2.** Frequency of ACRN and/or IND/LGD in the Propensity Score-Matched Cohort

|                | Statin exposed (n=57) | Statin non-exposed (n=114) | p-value |
|----------------|-----------------------|----------------------------|---------|
| ACRN           | 4 (7.0)               | 11 (9.6)                   | 0.57    |
| CRC            | 1 (1.8)               | 5 (4.4)                    | 0.38    |
| HGD            | 3 (5.3)               | 6 (5.3)                    | 1.00    |
| IND and/or LGD | 36 (31.6)             | 41 (36.0)                  | 0.57    |

Data are presented as number (%).

ACRN, advanced colorectal neoplasia; IND, indefinite dysplasia; LGD, low-grade dysplasia; CRC, colorectal cancer; HGD, high-grade dysplasia.
